# Supplementary material for: Vocalizations of adult male Asian koels (Eudynamys scolopacea) in the breeding season
Source: PLoS One. 2017 Oct 20;12(10):e0186604. doi: 10.1371/journal.pone.0186604 (PMC5650150; doi:10.1371/journal.pone.0186604)
Supplement: S1 File — (XLSX) [file pone.0186604.s007.xlsx]

## Sheet: ready data
groups	Duration	F0start	F0end	F0mean	F0manimum	F0maximum	F0range	Pitch(mean)	Pitch(manimum)	Pitch(maximum)	Pulses	Jitter	Shimmer	Fullss	Halfss	Diffusedss
1	391	13191	23171	18181	13191	23881	10690	475.86	351.58	524.02	217	4.32	9.96
1	407	14621	23161	18891	10541	22635	12094	464.3	349.76	505.55	200	3.73	9.84
1	422	15231	23212	19221.5	13321	23918	10597	495.06	365.73	534.19	191	3.66	9.49
1	421	14821	23078	18949.5	9119	22891	13772	495.35	345.12	511.27	205	4.02	10.26
1	428	14011	23375	18693	13410	23937	10527	481.84	363.32	525.28	234	4.17	10.18
1	439	14821	22533	18677	7286	22937	15651	489.59	334.58	512.28	205	3.58	8.68
1	413	14411	22241	18326	10951	23138	12187	510.8	353	516.79	188	5.71	19.94
1	406	15851	22533	19192	12151	22729	10578	535.11	371.41	518.86	170	4.61	16.43
1	378	16151	22533	19342	16251	23133	6882	542.65	372	516.66	182	4.75	17.71
1	383	16251	21985	19118	16451	23283	6832	517.57	351.08	521.89	168	4.68	13.65
1	408	14411	22507	18459	10951	23138	12187	510.8	353	516.79	188	5.34	19.94
1	436	15531	22339	18935	15131	23188	8057	454.37	349.7	517.89	145	5.56	16.62
1	463	16861	22587	19724	16761	23533	6772	552.58	374.3	518.11	173	4.61	13.61
1	360	16651	22587	19619	17371	22833	5462	555.08	374.08	519.31	181	4.83	11.26
1	413	16351	22727	19539	16251	23175	6924	543.18	372.67	517.61	179	5.05	15.38
1	373	16041	22727	19384	12381	23339	10958	532.49	355.1	521.26	173	5.27	17.36
1	407	16681	22763	19722	17161	23470	6309	557.49	374.86	520.45	185	4.75	14.99
1	401	16961	22599	19780	16961	23218	6257	556.43	374.52	518.56	169	5.12	15.25
1	412	14411	22599	18505	14111	23897	9786	498.05	365.2	515.03	166	5.56	20.49
1	358	15641	22559	19100	15641	23600	7959	477.09	357.35	517.74	147	5.41	19.36
1	412	16251	22676	19463.5	16151	23217	7066	547.14	373.51	518.54	186	4.75	17.05
1	369	16251	22880	19565.5	15841	23214	7373	460	361.72	520.34	155	4.9	12.19
1	362	16961	22533	19747	16961	22727	5766	549.5	374.12	520.68	177	5.56	13.16
1	426	15131	22625	18878	12681	22966	10285	475.4	359.02	512.94	155	4.17	15.38
1	361	13910	22313	18111.5	13910	23100	9190	511.41	365.03	515.93	187	4.54	15.24
1	430	13510	22391	17950.5	13710	23046	9336	494.05	363.8	514.71	183	4.1	12.65
1	382	14721	22479	18600	14721	23157	8436	526.88	367.57	517.2	174	5.71	19.08
1	413	14921	22479	18700	14821	23421	8600	542.35	367.96	519.37	184	5.63	17.74
1	357	13710	22367	18038.5	13810	22969	9159	529.32	363.87	518.62	184	5.41	16.71
1	384	14411	22676	18543.5	12281	23277	10996	545	357.02	519.87	188	4.46	12.34
1	369	15231	22533	18882	9119	22891	13772	494.83	345.13	511.25	203	3.88	9.14
1	438	20011	22880	21445.5	15531	23736	8205	571.75	359.19	526.4	210	5.19	14.8
1	360	14211	22673	18442	13810	23054	9244	494.26	364.81	514.9	157	5.56	19.54
1	352	16151	22274	19212.5	15741	23426	7685	480.19	360.45	517.61	144	5.34	19.6
2	437	13498	13210	13354	13331	19116	5785	534.83	445.82	588.6	218	1.5	6.9
2	408	13483	13457	13470	13140	19513	6373	536.59	444.64	589.77	219.09	1.5	6.62
2	443	13463	13367	13415	13321	19396	6075	531.18	437.73	586.28	219.45	1.79	8.77
2	436	13524	13548	13536	13199	19520	6321	537.76	447.03	589.96	223.57	1.58	5.48
2	444	13421	13291	13356	13310	19432	6122	531.37	440.38	587.35	220.69	1.99	7.5
2	436	13434	13335	13384.5	13163	19526	6363	537.91	444.36	590.15	223.75	1.48	6.63
2	442	13410	13390	13400	13289	19317	6028	529.28	438.06	583.95	218.18	1.79	8.12
2	442	13498	13516	13507	13254	19031	5777	534.77	443.87	588.75	218	1.61	5.52
2	440	13498	13482	13490	13539	19513	5974	536.73	444.14	591.89	220.86	1.58	6.25
2	441	13506	13766	13636	13492	19483	5991	535.64	452.27	590.98	215.31	1.55	7.02
2	435	13492	13719	13605.5	13539	19912	6373	536.96	451.54	591.87	217.63	1.53	7.14		1	ago
2	435	13506	13766	13636	13140	19918	6778	536.4	453.41	591.17	216.68	1.52	6.78		2	ad
2	439	13255	13367	13311	13140	19623	6483	532.65	438.58	593.04	223.38	2	8.76		3	cc
2	432	13454	13367	13410.5	13366	19680	6314	527.3	442.15	594.72	221.89	1.65	7.39		4	ag02
2	448	13343	13254	13298.5	13045	19628	6583	533.97	438.65	593.17	223.38	1.7	7.97		5	d
2	445	13506	13273	13389.5	13127	19914	6787	536.26	433.38	594.93	224.47	1.73	5.64		6	ter
2	441	13629	13186	13407.5	13232	19757	6525	539.68	437.02	597.02	222.88	1.82	5.47
2	448	13557	13460	13508.5	13480	19769	6289	540.34	440.74	597.36	217.36	1.81	5.72
2	448	13582	13199	13390.5	12972	19802	6830	542.39	439.44	598.35	226.2	2.02	8.12
2	440	13472	13200	13336	13424	19473	6049	521.11	445.11	588.58	218.55	1.5	6.97
2	440	13524	13314	13419	13097	20086	6989	536.51	437.86	589.79	221.67	1.52	6.67
2	445	13428	13696	13562	13210	19423	6213	532.64	443.82	587.07	217.61	1.69	8.37
2	440	13437	13099	13268	13151	19388	6237	530.37	440.81	586.05	226.57	1.72	8.29
2	441	13472	13378	13425	13163	19181	6018	531.18	437.93	586.28	221.32	1.79	8.77
2	446	13622	13390	13506	13232	19721	6489	539.08	441.38	595.95	225.6	1.77	7.4
2	446	13629	13460	13544.5	13187	19831	6644	543.07	441.34	599.2	226.96	1.7	5.4
2	449	13515	13414	13464.5	13289	19717	6428	539.58	440.12	595.83	228.41	1.85	6.18
2	446	13653	13516	13584.5	13102	19867	6765	544.39	442.22	600.29	227.83	1.76	6.97
2	448	13622	13329	13475.5	13256	19733	6477	539.95	440.65	596.29	225.6	1.89	8.8
2	440	13590	13281	13435.5	13102	19762	6660	541.77	433.03	597.16	224.03	1.54	7.4
2	451	13285	13329	13307	13413	19186	5773	524.41	435.34	580.04	221.89	1.43	6.93
2	439	13362	13793	13577.5	13163	19438	6275	531.22	448.5	587.52	217.63	1.28	5.93
2	449	13382	13390	13386	13472	18989	5517	530.81	438.33	589.07	222.99	1.65	6.61
2	440	13418	13811	13614.5	13373	19154	5781	532.01	442.32	587.6	217.81	2.7	10.08
2	441	13325	13811	13568	13594	19448	5854	531.16	447.92	587.83	217.81	2.29	10.25
2	447	13543	14094	13818.5	13518	19996	6478	547.2	460.85	597.74	228.43	1.62	8.18
2	450	13557	13880	13718.5	12903	19993	7090	548.91	458.64	597.63	226.11	2.27	7.18
2	438	13391	13864	13627.5	13443	19562	6119	534.59	461.13	591.21	218	2.21	10.08
2	438	13391	13837	13614	13547	19525	5978	534.34	433.23	590.13	219.11	1.94	10.23
2	444	13450	13461	13455.5	13310	20007	6697	548.87	459.37	595.93	229.55	1.44	7.07
2	444	13329	13737	13533	13310	19282	5972	528.6	445.06	582.88	218.18	1.95	11.1
2	440	13329	13837	13583	13321	19428	6107	530.71	444.91	587.24	214.63	1.91	10.45
2	445	13314	13548	13431	13256	19541	6285	533.28	444.09	590.58	222.39	2.85	11.39
2	445	13409	13484	13446.5	12919	19533	6614	541.31	442.84	592.47	223.05	2.29	11.06
2	444	13363	13382	13372.5	13310	18953	5643	520.53	428.82	579.5	215.71	1.82	8.08
2	437	13524	13537	13530.5	12972	19514	6542	536.71	444.71	589.79	219.45	1.52	6.67
2	439	13524	13233	13378.5	13221	19807	6586	537.39	444.59	590	219.63	1.72	6.18
2	444	13325	13618	13471.5	13300	19433	6133	531.37	438.6	587.37	220.86	2.21	7.73
2	438	13498	13527	13512.5	13310	19507	6197	528.66	443.9	589.58	219.45	1.53	5.76
2	444	13549	13537	13543	13151	19525	6374	537.89	444.37	590.13	227.32	1.78	6.23
2	431	13235	13378	13306.5	13278	19317	6039	529.45	438.06	583.95	223.41	1.78	8.09
2	437	13481	13506	13493.5	13483	19264	5781	542.49	443.73	588.75	218.55	1.74	6.58
2	445	13515	13710	13612.5	13519	19299	5780	536.96	450.97	591.89	217.81	1.53	7.14
2	434	13515	13747	13631	13268	19203	5935	536.4	453.12	591.17	223.2	1.52	6.78
2	441	13409	13595	13502	13268	19351	6083	529.74	441.33	584.94	217.63	1.75	7.67
2	436	13524	13710	13617	13065	19535	6470	537.5	451.32	590.41	215.93	1.52	8.63
2	447	13362	13292	13327	13000	19449	6449	531.84	433.89	587.86	222.88	2.19	11.42
2	448	13373	13228	13300.5	13289	19427	6138	538.3	432.24	587.2	222.88	2.22	11.05
2	451	13418	13516	13467	13384	19538	6154	532.29	443.55	581.99	225.44	1.71	8.84
2	446	13382	13611	13496.5	12983	19646	6663	536.81	450.25	593.7	223.05	1.62	7.07
2	450	13344	13548	13446	13342	19189	5847	545.03	445.11	580.14	224.34	1.66	8.48
2	446	13356	13569	13462.5	13331	19651	6320	535.84	446.41	593.85	224.18	1.69	7.15
2	448	13343	13559	13451	13362	19189	5827	531.72	447.87	582.27	223.38	1.62	8.32
2	448	13362	13589	13475.5	12983	19651	6668	535.8	446.41	593.85	224.34	1.7	7.16
2	442	13362	13548	13455	13342	19644	6302	536.71	441.81	593.66	222.22	1.59	7.82
2	451	13294	13317	13305.5	13210	19186	5976	524.62	439.27	580.04	221.55	1.41	6.9
2	446	13319	13403	13361	13393	19372	5979	529.57	444.61	585.56	220.86	1.39	7.42
2	442	13343	13793	13568	13403	19438	6035	531.18	448.5	587.52	215.57	1.28	4.93
2	448	13728	13631	13679.5	13529	19697	6168	543.15	450.33	595.23	228.99	1.28	4.83
2	448	13660	13757	13708.5	13424	19867	6443	548.02	453.49	600.29	228.12	1.32	5.18
2	447	13654	13651	13652.5	13424	19578	6154	540.32	449.3	591.7	226.81	1.35	4.61
2	447	13642	13651	13646.5	12866	19636	6770	541.79	449.24	593.42	226.96	1.36	7.64
2	441	13472	12688	13080	12903	19373	6470	524.72	428.08	585.6	228.24	2.08	7.57
2	435	13463	13131	13297	12919	19141	6222	538.75	441.65	589.34	219.63	1.89	6.42
2	437	13489	13213	13351	13115	19641	6526	543.17	431.75	589.3	219.99	2.13	6.48
2	441	13541	13103	13322	13017	18923	5906	539.23	443.5	593.49	222.47	1.76	6.91
2	436	13353	12568	12960.5	13154	19259	6105	529.09	426.15	582.22	215.11	2.35	8.64
2	430	13634	12401	13017.5	12855	19432	6577	533.28	435.25	587.35	220.95	1.96	9.6
2	440	13641	12744	13192.5	12674	19433	6759	536.36	427.11	583.12	220.16	1.9	6.54
2	447	13629	12902	13265.5	13199	19942	6743	547.32	429.61	585.5	228.56	2.62	9.07
2	438	13620	13426	13523	13379	19514	6135	536.92	446.8	589.79	218.91	1.5	6.65
2	438	13613	13437	13525	13163	19593	6430	537.39	444.59	590	219.81	1.72	6.18
2	441	13585	13390	13487.5	13256	19507	6251	536.48	439.34	589.58	219.28	1.51	5.75
2	436	13481	13484	13482.5	13221	19121	5900	527.24	445.05	588.75	213.62	1.55	6.52
2	440	13498	13313	13405.5	13244	19156	5912	542.57	444.05	589.77	220.69	1.58	5.94
2	445	13506	13471	13488.5	13163	19476	6313	535.39	444.63	588.66	218.74	1.56	7.73
2	438	13557	13390	13473.5	13300	19558	6258	540.12	438.21	591.11	221.55	1.46	4.52
2	436	13506	13527	13516.5	13412	19536	6124	537.89	457.23	590.43	219.28	1.64	6.37
2	435	13566	13233	13399.5	13321	19610	6289	538.63	445.9	582.01	218.91	1.49	5.94
2	433	13566	13548	13557	13289	19577	6288	543.56	446.11	591.66	217.81	1.44	4.47
2	439	13541	13516	13528.5	12941	19510	6569	535.95	444.29	589.68	219.63	1.78	6.7
2	443	13489	13506	13497.5	13453	19178	5725	536.98	444.54	590.43	220.56	1.83	7.21
2	435	13541	13680	13610.5	12903	19531	6628	537.99	435.02	581.78	217.06	1.46	6.76
2	438	13489	13131	13310	13163	18967	5804	538.18	428.1	584.16	217.63	1.97	6.62
2	449	13472	12816	13144	13268	19401	6133	534.48	439.26	586.43	221.55	2.09	9.42
2	435	13481	13056	13268.5	13127	19401	6274	536.63	449.45	586.43	219.28	1.74	8.82
2	446	13463	13355	13409	13114	19447	6333	534.01	437.74	587.79	221.21	1.86	8.54
2	445	13463	13341	13402	13216	19447	6231	543.48	437.57	587.79	221.37	1.88	8.55
2	438	13508	13443	13475.5	13281	19144	5863	536.32	444.91	585.18	215.48	1.57	4.46
2	445	13530	13170	13350	12778	19322	6544	537.89	444.88	586.22	218.91	1.65	6.28
2	437	13559	13005	13282	12764	19440	6676	536.2	430.09	587.58	213.75	2.03	7.11
2	437	13568	12721	13144.5	13264	19406	6142	534.57	420.56	586.58	217.63	1.99	7.92
2	446	13556	13288	13422	13368	19523	6155	537.33	445.6	583.67	219.17	1.58	6.21
2	437	13547	13596	13571.5	13187	19533	6346	545.24	456.71	590.34	218.36	1.64	6.98
2	448	13568	13077	13322.5	13220	18844	5624	535.04	442.34	586.88	220.69	1.9	10.93
2	436	13546	13447	13496.5	12801	19299	6498	537	448.36	589.77	221.38	1.57	4.21
2	442	13530	13163	13346.5	13260	19252	5992	531.18	430.46	588.39	221.14	1.97	6.84
2	450	13564	13149	13356.5	13081	19755	6674	538.18	427.34	584.2	215.6	1.63	6.07
3	135	12991	16251	14621	12370	19789	7419	549.73	413.21	618.32	33.03	3.46	17.6
3	148.84	14721	16551	15636	12570	20435	7865	546.54	417.46	633.07	39.77	2.65	11.28
3	166.19	11611	16351	13981	12216	20413	8197	554.53	406.84	632.41	44.77	2.76	14.54
3	168.27	12891	16151	14521	12360	20033	7673	512.08	417.47	632.21	43.46	2.69	13.58
3	170.38	12481	16041	14261	12315	20397	8082	518.2	410.79	631.94	44.12	3.19	15.64
3	176.02	16861	10511	13686	12728	20027	7299	522.99	423.73	614.31	33.03	3	10.6
3	175.06	15331	11461	13396	12198	19851	7653	572.44	408.69	615.73	41.94	2.79	9.36
3	177.27	17881	12481	15181	12315	19995	7680	493.79	414.9	620.03	36.51	4.89	9.45
3	175.06	18181	15331	16756	12597	20210	7613	546.9	422.39	626.38	33.68	2.27	10.15
3	173.76	19711	14821	17266	12551	20331	7780	592.61	424.09	629.99	35.86	4.52	10.14
3	167.91	10751	11871	11311	12110	19891	7781	621.63	416.98	605.85	40.2	2.6	14.07
3	157.38	13810	11361	12585.5	12186	19273	7087	436.59	405.99	616.3	42.38	4.83	10.89
3	159.32	16961	13091	15026	12381	20037	7656	468.16	414.41	621.24	43.9	4.09	6.64
3	157.38	17770	13710	15740	12444	20173	7729	538.36	416.4	625.3	44.55	2.21	5.88
3	156.1	19410	12891	16150.5	12360	20241	7881	570.78	397.75	627.31	38.68	4.1	5.75
3	111.81	16251	16151	16201	12732	20451	7719	580.07	419.88	631.32	41.51	3.61	17.56
3	162.95	13410	11561	12485.5	12210	19469	7259	560.29	405.53	604.41	34.99	4.12	19.57
3	159.94	15531	10951	13241	12136	19560	7424	478.4	403.4	607.09	42.16	3.43	19.63
3	152.1	15741	8915	12328	11854	19540	7686	486.49	394.07	606.51	41.07	3.14	16.96
3	153.91	13610	14921	14265.5	12434	20440	8006	489.44	415.52	631.01	38.68	3.84	18
3	156.96	11661	11051	11356	12148	19434	7286	520.46	406.89	603.37	37.16	3.98	18.51
3	155.67	16551	12781	14666	12348	19639	7291	467.14	413.08	609.44	41.73	2.58	16.02
3	137.26	15331	12681	14006	12337	19551	7214	516.32	411.91	606.82	39.77	2.64	16.97
3	150.71	12681	11241	11961	12148	20440	8292	498.49	412.77	633.23	33.68	2.48	14.46
3	165.49	14921	17271	16096	12560	19276	6716	541.9	421.87	609.75	41.29	5	23.38
3	153.02	14211	16861	15536	12493	19679	7186	511.98	418.55	619.49	41.07	4.24	17.76
3	150.71	15741	15781	15761	12633	19632	6999	521.11	422.86	611.45	34.55	5.12	20.23
3	156.96	15331	13510	14420.5	12424	19960	7536	515.57	415.25	618.96	39.33	2.63	8.66
3	146.96	11161	12171	11666	12162	19481	7319	539.61	405.91	604.76	42.81	2.69	11.64
3	161.27	12991	12171	12581	12281	20466	8185	450.74	413.86	607.4	35.64	2.02	10.91
3	163.64	15331	12581	13956	12326	19681	7355	477.01	413.38	615.11	43.25	2.05	10.11
3	165.7	15231	12781	14006	12348	19608	7260	496.41	408.03	608.53	42.59	4.15	11.16
3	170.03	14921	15341	15131	12560	20346	7786	483.82	400.51	630.44	38.68	2.19	9.2
3	172.42	13191	12481	12836	12315	19542	7227	493.72	401.87	606.56	42.81	4.15	9.85
3	177.41	14721	12281	13501	12293	19563	7270	466.77	412.12	616.04	37.81	2.17	10.13
3	163.76	12891	15231	14061	12360	19457	7097	477.12	411.5	604.03	40.2	4.43	12.08
3	162.66	15841	13510	14675.5	12424	19936	7512	467.67	416.07	618.25	35.21	2.96	10.43
3	164.57	9424	16041	12732.5	11930	20429	8499	552.73	395.09	632.9	44.77	3.01	13.22
3	164.57	11871	17371	14621	12247	20425	8178	459.76	402.19	632.79	43.46	2.5	12.16
3	140.62	10681	15641	13161	12337	19872	7535	479.41	413.38	598.63	33.25	5.44	13.91
3	176.34	14111	15331	14721	12138	19675	7537	462.24	417.1	610.52	37.6	2.1	10.78
3	178.21	16251	13410	14830.5	12414	20031	7617	505.02	412.8	614.42	44.33	1.9	9.23
3	162.88	11771	9832	10801.5	11988	20257	8269	529.04	408.85	598.98	40.64	2.73	15.53
3	179.73	15741	9818	12779.5	12539	19295	6756	468.48	391.94	599.25	33.25	4.81	15.61
3	173.74	11871	9719	10795	11885	19486	7601	410.43	393.81	604.92	39.55	2.96	16.6
3	180.74	12171	10171	11171	11869	19394	7525	454.7	394.32	602.17	37.38	3.04	18.53
3	181.6	11051	13041	12046	12388	19317	6929	434.99	393.53	602.1	41.07	4.42	18.34
3	155.58	14411	17091	15751	11705	19845	8140	422.08	393.32	615.55	33.68	2.86	12.23
3	146.68	12381	14006	13193.5	11773	20139	8366	439.33	396.39	599.91	39.77	4.38	22.14
3	142.76	12171	17061	14616	12281	20151	7870	441.44	410.34	624.66	34.34	5.59	14.02
3	174.74	10851	11871	11361	12123	19699	7576	475.86	405.01	602.37	39.12	2.07	11.58
3	177.89	11971	11871	11921	12247	19265	7018	443.3	409.07	607.2	44.33	1.92	10.55
3	176.47	12781	13091	12936	12348	20149	7801	491.06	395.38	609.08	43.68	3.9	13.48
3	176.66	14211	13710	13960.5	12444	20052	7608	501.01	405.64	617.28	43.46	2.12	9.99
3	175.78	13910	19210	16560	12212	20014	7802	527.59	411.22	620.58	44.12	4.71	14
4	378	15372	16800	16086	13244	18081	4837	528.66	460.38	571.15	201	1.88	8.42
4	392	15114	17189	16151.5	12814	18280	5466	529.88	434.12	572.6	201.19	1.83	7.49
4	369	15127	17251	16189	13124	18303	5179	529.42	452.67	572.33	201.38	2.15	7.85
4	399	15324	16667	15995.5	13124	18978	5854	528.11	457.53	575.11	204.08	1.75	7.49
4	423	15154	16768	15961	12687	18713	6026	529.42	437.8	574.57	205.44	2	9.53
4	407	15204	16830	16017	12759	18325	5566	529.88	455.16	583.21	204.42	1.73	9.55
4	407	15214	17271	16242.5	12871	18810	5939	529.79	456.01	573.7	205.1	1.81	9.04
4	373	15214	16881	16047.5	13146	18342	5196	531.98	455.45	573.7	205.28	1.81	9.04
4	388	15204	17303	16253.5	13284	18293	5009	529.28	465.57	570.05	202.84	1.6	6.65
4	405	15250	16654	15952	13113	18158	5045	528.45	454.33	572.72	204.25	1.68	7.6
4	375	15165	17251	16208	13074	18333	5259	532.65	450.04	570.76	201.38	1.71	8.56
4	398	15355	17370	16362.5	13179	18252	5073	524.46	459.08	569.78	204.6	1.62	7.11
4	408	15260	17135	16197.5	13052	18061	5009	530.35	453.21	575.67	203.91	1.69	7.12
4	423	15167	17322	16244.5	12805	18115	5310	528.11	455.71	569.95	204.94	2.29	8.21
4	417	15156	17199	16177.5	13015	18408	5393	529.92	451.58	571.56	204.08	1.77	7.24
4	424	15160	17293	16226.5	13076	18566	5490	525	439.24	578.24	205.94	1.93	8.54
4	411	15252	16800	16026	12621	18826	6205	530.25	447.12	572.62	202.84	2.39	9.64
4	424	15264	16840	16052	12829	18775	5946	527.05	453.27	574.15	204.25	1.95	8.82
4	438	15230	17271	16250.5	12556	18111	5555	523.76	440.46	572.64	207.24	2.72	6.65
4	398	15124	16988	16056	13015	18166	5151	521.08	451.13	567.3	200.62	1.82	8.81
4	398	15080	17000	16040	13180	18610	5430	530.31	457.08	568.93	199.66	2.08	11.84
4	394	15387	17322	16354.5	13243	18451	5208	533.36	459.2	576	201.56	2.48	11.43
4	438	15154	17031	16092.5	13307	18407	5100	526.7	463.65	569.16	206.93	2.42	11.25
4	444	15524	16827	16175.5	13113	18394	5281	516.41	455.33	567.86	206.44	2.34	10.16
4	438	15070	16695	15882.5	12748	18456	5708	524.4	441.55	575.75	201	3.18	13.92
4	438	15029	16594	15811.5	12873	18324	5451	522.69	443.14	578.24	204.94	2.13	14
4	444	15044	16654	15849	12509	18522	6013	530.72	433.81	573.66	199.85	3.57	12.46
4	404	15029	16866	15947.5	13201	18500	5299	525.3	459.15	577.51	205.1	2.31	12.68
4	446	15575	16708	16141.5	12940	18960	6020	524.42	447.85	571.05	205.28	2.02	11.86
4	464	15062	17005	16033.5	13265	18826	5561	524.65	456.8	584.37	203.73	1.9	9.67
4	444	15083	17135	16109	13326	18762	5436	523	457.51	584.53	200.05	2.71	10.18
4	457	15040	17135	16087.5	13265	18544	5279	524.42	462.66	584.68	201.75	3.12	10.22
4	457	15062	17015	16038.5	13265	18951	5686	522.81	456.8	584.37	203.73	2.5	9.67
4	451	15351	17124	16237.5	13265	18277	5012	531.13	451.39	586.17	202.84	2.2	8.97
4	342	15235	17209	16222	12933	18867	5934	530.72	462.39	572.25	203.37	2.04	6.79
4	404	15144	17231	16187.5	13027	18405	5378	533.89	452.58	569.16	202.66	1.73	8.2
4	364	15285	17103	16194	12598	18089	5491	533.36	447.6	576.08	201.81	3.31	11.61
4	361	15230	17241	16235.5	13366	18581	5215	532.31	464.62	580.43	200.55	3.41	15.4
5	92	11639	11520	11579.5	10911	17788	6877	568.18	388.29	581.43	50	3.57	11.04
5	92	11534	11336	11435	10831	17987	7156	485.71	387.36	568.9	42	3.05	10.96
5	87	11555	11446	11500.5	10885	17764	6879	458.21	387.78	562.11	39	3.01	12.04
5	81	11500	11748	11624	10911	18182	7271	533.8	388.78	574.85	39	3.55	13.84
5	86	11511	11781	11646	10844	18121	7277	522.95	386.19	572.97	43	3.36	14.63
5	86	11608	11432	11520	10857	17551	6694	442.06	385.04	555.64	38	2.34	12.92
5	98	11650	11350	11500	10844	17861	7017	468.62	378.71	565.06	44	2.83	10.5
5	112	11787	11473	11630	10963	17900	6937	522.92	393	566.26	66	1.9	10.38
5	107	11393	11901	11647	10696	18250	7554	603	395.37	576.89	64	1.54	6.07
5	73	11488	11489	11488.5	10625	17611	6986	409.29	365.5	557.46	30	4.6	18.74
5	87	11576	11345	11460.5	10535	17710	7175	442.03	367.47	560.45	38	4.47	13.32
5	81	11522	11419	11470.5	10911	17893	6982	492.1	385.94	566.05	39	4.41	14.5
5	77	11555	11336	11445.5	10831	17589	6758	442.16	385.01	556.8	33	4.65	14.85
5	100	11477	11621	11549	10911	17943	7032	488.84	385.83	567.56	48	4.27	12.56
5	92	11369	11350	11359.5	10817	17698	6881	453.67	381.45	560.1	39	4.33	17.37
5	146	11369	11171	11270	10671	18013	7342	458.91	379.85	569.71	67	4.26	13.28
5	100	11135	11292	11213.5	10687	17691	7004	446.18	380.55	559.88	37	4.65	18.44
5	93	11369	11308	11338.5	10511	17758	7247	449.7	373.05	561.94	42	3.89	16.59
5	77	11381	11589	11485	10616	17684	7068	446.44	365.32	559.69	32	5.58	16.66
5	69	11344	11802	11573	10701	17680	6979	487.52	369.21	563.7	34	4	8.73
5	68	11222	11802	11512	10657	17828	7171	484.78	380.75	564.05	32	4.45	13.5
5	67	11222	11855	11538.5	10511	17906	7395	481.33	374.57	566.44	31	3.64	9.27
5	88	11544	11623	11583.5	10511	17769	7258	464.8	375.17	562.27	36	3.9	12.77
5	107	11854	11845	11849.5	10898	18092	7194	505.6	388.07	572.1	55	3.94	15.65
5	75	11879	11263	11571	10760	17652	6892	456.07	380.22	558.7	28	4.32	16.43
5	86	11555	11292	11423.5	10788	17771	6983	471.97	384.74	562.31	36	3.32	17.11
5	58	11393	11520	11456.5	10911	17731	6820	492.18	389.13	561.12	28	2.49	11.17
5	133	11453	11640	11546.5	10716	17926	7210	454.01	382.28	567.04	58	2.76	13.88
5	127	11500	11562	11531	10788	17954	7166	493.8	380.82	567.89	59	4.24	13.48
5	51	11331	11802	11566.5	10844	17690	6846	482.84	387.53	559.86	26	3.47	14.32
5	86	11369	11248	11308.5	10641	17603	6962	432.34	380.22	557.21	34	3.71	13.75
5	104	11442	11834	11638	10687	18010	7323	488.29	381.26	569.6	51	3.72	15.85
5	63	11466	11748	11607	10774	17577	6803	461.42	383.9	556.43	25	2.84	15.18
5	110	11591	11546	11568.5	10803	18101	7298	503.69	384.66	572.37	55	4.11	15.22
5	63	11682	11234	11458	10989	17547	6558	445.43	383.13	555.52	26	3.74	17.07
5	63	11613	11263	11438	10760	17615	6855	457.23	375.71	557.56	27	2.69	12.55
5	130	11453	11488	11470.5	10803	17970	7167	456.78	382.16	568.38	57	2.99	14.64
5	81	11208	11583	11395.5	10716	17658	6942	444.91	383.4	558.88	34	3.88	15.26
5	108	11647	11156	11401.5	10766	18013	7247	435.64	375.65	561.45	46	4.67	15.04
5	74	11165	11171	11168	10762	17681	6919	455.4	380.21	559.59	32	3.21	13.33
5	100	11394	11234	11314	10761	17891	7130	470.97	373.92	565.97	43	4.02	11.7
5	92	11739	11156	11447.5	10757	17740	6983	440.77	376.7	575.84	36	3.39	12.68
5	108	11483	11422	11452.5	10753	18054	7301	482.5	390.34	570.94	51	3.25	10.83
6	464	14097	12095	13096	8896	20502	11606	419.14	298.79	602.89	184	4.74	10.21
6	456	14140	12182	13161	9019	20535	11516	439.96	302.41	603.89	188	2.44	11.3
6	456	14100	11708	12904	8552	20623	12071	414.14	291.15	606.49	178	7.88	6.85
6	462	14036	11792	12914	9100	20892	11792	597.87	304.16	614.51	275	1.81	6.46
6	424	14039	12441	13240	9246	20545	11299	504.24	287.09	604.17	216	2.53	8.98
6	424	14432	12283	13357.5	8458	20772	12314	519.81	287.31	610.94	198	3.77	11.95
6	478	14413	12041	13227	8627	20549	11922	362.14	278.15	604.28	165	7.16	13.88
6	439	14452	12178	13315	8763	20709	11946	452.44	287.9	609.07	181	4.73	12.66
6	409	14432	12570	13501	8635	20772	12137	518.86	288.28	610.94	195	3.73	12.08
6	534	14454	11663	13058.5	8950	20824	11874	522.19	301.87	612.5	265	2.58	8.97
6	484	14408	11858	13133	9178	19743	10565	418.92	306.62	582.42	199	3.53	9.06
6	490	14388	12105	13246.5	9207	19826	10619	381.04	305.43	582.72	182	2.44	10.15
6	492	14464	11792	13128	9100	20928	11828	548.39	300.02	615.6	249	2.32	6.13
6	452	14517	12219	13368	9265	19731	10466	407.11	308.99	579.9	174	2.27	9.06
6	510	14574	11806	13190	9116	21042	11926	575.89	304.9	619	288	3.71	7.47
6	491	14799	11934	13366.5	9265	20916	11651	577.7	309.3	615.23	278	4.54	6.82
6	422	14559	12238	13398.5	9080	20971	11891	612.28	318.09	616.88	233	1.93	3.94
6	495	14592	11970	13281	9308	20010	10702	450.06	309.41	588.23	216	2.81	7.67
6	571	14528	12142	13335	9050	19907	10857	427.87	281.69	585.15	232	2.85	10.27
6	617	14452	12394	13423	9308	20857	11549	535.84	310.31	613.47	263	2.74	10.33
6	626	14561	11683	13122	8620	21091	12471	523.43	277.37	620.45	334	1.85	8.92
6	420	14381	12295	13338	8816	20290	11474	476.23	277.47	596.56	126	6.2	13.29
6	437	14351	12365	13358	8619	20705	12086	463.54	283.71	608.94	184	4.85	12.63
6	470	14339	12119	13229	8783	20541	11758	478.91	296.51	604.06	210	3.65	10.66
6	461	14407	12028	13217.5	8841	20258	11417	435.3	298.02	595.63	190	4.13	10.86
6	475	14174	12091	13132.5	8890	20484	11594	486.65	299.48	600.18	219	3.28	10.03
6	401	14385	11962	13173.5	9190	20391	11201	484.84	305.97	599.59	228	3.13	8.12
6	433	14413	12008	13210.5	9204	20526	11322	503.24	306.56	603.61	232	3.02	7.71
6	477	14398	11988	13193	8965	20360	11395	472.9	301	598.66	212	3.32	9.39
6	479	14204	11996	13100	9339	20762	11423	553.98	310.64	610.63	253	3.25	6.47
6	459	14250	11966	13108	9265	20151	10886	509.18	307.94	601.09	235	3.04	7.32
6	442	14225	12000	13112.5	9309	20568	11259	520.64	297.1	602.69	234	2.92	6.94
6	412	14281	12283	13282	8549	20678	12129	444.48	282.65	608.14	180	5.21	12.87
6	412	14183	11832	13007.5	9147	20334	11187	496.73	305.22	597.88	227	2.53	7.29
6	444	14143	12005	13074	9361	20977	11616	588.62	311.05	617.05	266	3.4	6.08
6	451	14258	11954	13106	9162	20621	11459	510.46	304.76	606.42	237	2.77	7.55

## Sheet: Raw data
				Key
				Type 1 cooee call	1
				Type 2 cooee call	2
				Type 1 coegh call	3
				Type 2 coegh call	4
				Wurroo call	5
				Coe call	6
		Goups	duration(s)	F0s	F0e	F0min	F0max	Pitchm	Pitch min	Pitch max	Jitter%	Shimmer %	full ss	half ss	diffused ss
		1	0.437	13498	13210	13331	19116	534.83	445.82	588.6	1.21	6.9	11	0	0
		1	0.408	13483	13457	13140	19513	536.59	444.64	589.77	2.93	6.62	11	0	0
		1	0.443	13463	13367	13321	19396	531.18	437.73	586.28	2.08	8.77	11	0	0
		1	0.436	13524	13548	13199	19520	537.76	447.03	589.96	1.79	5.48	11	0	0
		1	0.444	13421	13291	13310	19432	531.37	440.38	587.35	1.81	7.5	11	0	0
		1	0.436	13434	15335	13163	19526	537.91	444.36	590.15	2.34	6.63	11	0	0
		1	0.442	13410	15390	13289	19317	529.28	438.06	583.95	1.43	8.12	11	0	0
		1	0.442	13498	14516	13254	19031	534.77	443.87	588.75	1.83	6.52	10	0	0
		1	0.44	13498	13482	13539	19513	536.73	444.14	591.89	1.56	6.25	10	1	0
		1	0.441	13506	12766	13492	19483	535.64	452.27	590.98	3.33	7.02	10	1	0
		1	0.435	13492	12719	13539	19912	536.96	451.54	591.87	3.25	7.14	7	1	0
		1	0.435	13506	12766	13140	19918	536.4	453.41	591.17	3.09	6.78	8	0	0
		1	0.439	13255	13367	13140	19623	532.65	438.58	593.04	1.07	8.76	8	0	0
		1	0.432	13454	13367	13366	19680	527.3	442.15	594.72	1.7	7.39	8	1	0
		1	0.448	13343	13254	13045	19628	533.97	438.65	593.17	2.28	3.52	8	0	0
		1	0.445	13506	14273	13127	19914	536.26	433.38	594.93	1.95	3.25	8	0	0
		1	0.441	13629	14186	13232	19757	539.68	437.02	597.02	1.78	4.02	8	0	0
		1	0.448	13557	14460	13480	19769	540.34	440.74	597.36	2.03	4.14	8	0	0
		1	0.448	13582	13199	12972	19802	542.39	439.44	598.35	2.43	3.78	8	1	0
		1	0.44	13472	13200	13424	19473	521.11	445.11	588.58	3.28	5.76	8	0	0
		1	0.44	13524	13314	13097	20086	536.51	437.86	589.79	2.98	4.39	8	0	0
		1	0.445	13428	13696	13210	19423	532.64	443.82	587.07	1.68	7.97	8	0	0
		1	0.44	13437	12099	13151	19388	530.37	440.81	586.05	1.6	6.64	8	0	0
		1	0.441	13472	13378	13163	19181	531.18	437.93	586.28	1.08	6.47	10	1	0
		1	0.446	13622	12390	13232	19721	539.08	441.38	595.95	2.71	5.72	10	1	0
		1	0.446	13629	12460	13187	19831	543.07	441.34	599.2	2.71	8.12	10	1	0
		1	0.449	13515	12414	13289	19717	539.58	440.12	595.83	2.49	6.97	10	1	0
		1	0.446	13653	13516	13102	19867	544.39	442.22	600.29	1.28	6.67	10	1	0
		1	0.448	13622	14329	13256	19733	539.95	440.65	596.29	2.11	8.37	10	1	0
		1	0.44	13590	14281	13102	19762	541.77	433.03	597.16	2.71	8.29	10	1	0
		1	0.451	13285	13329	13413	19186	524.41	435.34	580.04	3.24	8.77	10	1	0
		1	0.439	13362	14793	13163	19438	531.22	448.5	587.52	2.24	7.4	9	1	0
		1	0.449	13382	14390	13472	18989	530.81	438.33	589.07	2.92	6.4	9	1	0
		1	0.44	13418	14811	13373	19154	532.01	442.32	587.6	3.39	4.97	9	1	0
		1	0.441	13325	14811	13594	19448	531.16	447.92	587.83	2.56	3.64	9	1	0
		1	0.447	13543	14094	13518	19996	547.2	460.85	597.74	2.49	3.47	9	1	0
		1	0.45	13557	13880	12903	19993	548.91	458.64	597.63	2.49	2.72	9	1	0
		1	0.438	13391	13864	13443	19562	534.59	461.13	591.21	2.39	5.12	9	1	0
		1	0.438	13391	13837	13547	19525	534.34	433.23	590.13	1.54	3.97	7	1	0
		1	0.444	13450	13461	13310	20007	548.87	459.37	595.93	1.38	3.67	7	1	0
		1	0.444	13329	13737	13310	19282	528.6	445.06	582.88	3.41	5.37	8	0	0
		1	0.44	13329	14837	13321	19428	530.71	444.91	587.24	1.76	5.29	7	1	0
		1	0.445	13314	14548	13256	19541	533.28	444.09	590.58	1.7	6.18	7	1	0
		1	0.445	13409	12484	12919	19533	541.31	442.84	592.47	7.37	6.97	7	1	0
		1	0.444	13363	12382	13310	18953	520.53	428.82	579.5	2.39	8.8	8	0	0
		1	0.437	13524	12537	12972	19514	536.71	444.71	589.79	2.98	7.4	8	0	0
		1	0.439	13524	13233	13221	19807	537.39	444.59	590	1.49	6.93	8	0	0
		1	0.444	13325	13618	13300	19433	531.37	438.6	587.37	1.04	4.93	13	0	0
		1	0.438	13498	14527	13310	19507	528.66	443.9	589.58	2.07	6.61	13	0	0
		1	0.444	13549	13537	13151	19525	537.89	444.37	590.13	2.54	14.08	12	1	0
		1	0.431	13235	13378	13278	19317	529.45	438.06	583.95	4.4	11.25	11	1	0
		1	0.437	13481	13506	13483	19264	542.49	443.73	588.75	2.89	8.18	7	3	0
		1	0.445	13515	13710	13519	19299	536.96	450.97	591.89	1.45	7.18	7	3	0
		1	0.434	13515	14747	13268	19203	536.4	453.12	591.17	1.09	13.08	7	3	0
		1	0.441	13409	14595	13268	19351	529.74	441.33	584.94	1.98	12.73	7	3	0
		1	0.436	13524	14710	13065	19535	537.5	451.32	590.41	2.94	7.07	7	3	0
		1	0.447	13362	14292	13000	19449	531.84	433.89	587.86	2.73	11.5	13	2	0
		1	0.448	13373	14228	13289	19427	538.3	432.24	587.2	3.36	10.45	13	2	0
		1	0.451	13418	12516	13384	19538	532.29	443.55	581.99	1.15	11.39	13	2	0
		1	0.446	13382	13611	12983	19646	536.81	450.25	593.7	1.38	12.66	10	1	0
		1	0.45	13344	15548	13342	19189	545.03	445.11	580.14	1.79	8.08	11	1	0
		1	0.446	13356	15569	13331	19651	535.84	446.41	593.85	1.46	6.67	11	1	0
		1	0.448	13343	14559	13362	19189	531.72	447.87	582.27	1.63	6.18	11	1	0
		1	0.448	13362	14589	12983	19651	535.8	446.41	593.85	1.47	7.73	11	1	0
		1	0.442	13362	14548	13342	19644	536.71	441.81	593.66	2.13	5.76	11	1	0
		1	0.451	13294	12317	13210	19186	524.62	439.27	580.04	1.21	6.23	11	1	0
		1	0.446	13319	13403	13393	19372	529.57	444.61	585.56	1.73	8.09	11	1	0
		1	0.442	13343	13793	13403	19438	531.18	448.5	587.52	1.24	6.58	11	1	0
		1	0.448	13728	13631	13529	19697	543.15	450.33	595.23	1.14	7.14	6	2	0
		1	0.448	13660	13757	13424	19867	548.02	453.49	600.29	1.49	6.78	6	1	0
		1	0.447	13654	12651	13424	19578	540.32	449.3	591.7	1.18	7.67	6	1	0
		1	0.447	13642	13651	12866	19636	541.79	449.24	593.42	1.95	8.63	6	1	0
		1	0.441	13472	12688	12903	19373	524.72	428.08	585.6	1.88	11.72	6	1	0
		1	0.435	13463	13131	12919	19141	538.75	441.65	589.34	1.73	12.65	6	1	0
		1	0.437	13489	13213	13115	19641	543.17	431.75	589.3	1.79	8.84	6	1	0
		1	0.441	13541	12103	13017	18923	539.23	443.5	593.49	2.22	7.07	6	1	0
		1	0.436	13353	12568	13154	19259	529.09	426.15	582.22	2.95	8.48	6	1	0
		1	0.43	13634	12401	12855	19432	533.28	435.25	587.35	2.91	7.15	6	1	0
		1	0.44	13641	12744	12674	19433	536.36	427.11	583.12	2.85	8.32	8	1	0
		1	0.447	13629	12902	13199	19942	547.32	429.61	585.5	1.38	7.16	8	1	0
		1	0.438	13620	13426	13379	19514	536.92	446.8	589.79	1.96	7.82	9	2	0
		1	0.438	13613	12437	13163	19593	537.39	444.59	590	2.49	6.9	9	2	0
		1	0.441	13585	13390	13256	19507	536.48	439.34	589.58	3.06	5.42	9	2	0
		1	0.436	13481	13484	13221	19121	527.24	445.05	588.75	2.83	4.93	9	2	0
		1	0.44	13498	14313	13244	19156	542.57	444.05	589.77	3.25	2.83	10	2	0
		1	0.445	13506	14471	13163	19476	535.39	444.63	588.66	3.04	3.18	10	0	0
		1	0.438	13557	13390	13300	19558	540.12	438.21	591.11	1.83	2.61	10	0	0
		1	0.436	13506	14527	13412	19536	537.89	457.23	590.43	2.68	2.64	10	0	0
		1	0.435	13566	12233	13321	19610	538.63	445.9	582.01	2.25	5.77	10	1	0
		1	0.433	13566	13548	13289	19577	543.56	446.11	591.66	1.16	4.4	10	1	0
		1	0.439	13541	12516	12941	19510	535.95	444.29	589.68	2	3.4	10	1	0
		1	0.443	13489	15506	13453	19178	536.98	444.54	590.43	2.52	3.18	11	1	0
		1	0.435	13541	14680	12903	19531	537.99	435.02	581.78	2.07	3.97	11	1	0
		1	0.438	13489	13131	13163	18967	538.18	428.1	584.16	1.93	5.8	11	0	0
		1	0.449	13472	12816	13268	19401	534.48	439.26	586.43	2.73	4.4	11	0	0
		1	0.435	13481	12056	13127	19401	536.63	449.45	586.43	1.13	3.93	11	0	0
		1	0.446	13463	14355	13114	19447	534.01	437.74	587.79	1.85	4.66	11	0	0
		1	0.445	13463	15341	13216	19447	543.48	437.57	587.79	2.86	3.29	11	0	0
		1	0.438	13508	15443	13281	19144	536.32	444.91	585.18	1.97	3.87	9	1	0
		1	0.445	13530	12170	12778	19322	537.89	444.88	586.22	2.59	2.54	9	1	0
		1	0.437	13559	13005	12764	19440	536.2	430.09	587.58	3.22	2.37	9	1	0
		1	0.437	13568	12721	13264	19406	534.57	420.56	586.58	1.23	1.62	9	0	0
		1	0.446	13556	13288	13368	19523	537.33	445.6	583.67	2.52	4.02	9	0	0
		1	0.437	13547	13596	13187	19533	545.24	456.71	590.34	3.29	2.87	7	2	0
		1	0.448	13568	12077	13220	18844	535.04	442.34	586.88	3.24	2.57	9	0	0
		1	0.436	13546	13447	12801	19299	537	448.36	589.77	1.52	4.27	11	1	0
		1	0.442	13530	13163	13260	19252	531.18	430.46	588.39	3.15	4.19	10	1	0
		1	0.45	13564	12149	13081	19755	538.18	427.34	584.2	2.38	4.67	10	1	0
		2	0.464	14097	11095	8896	20502	419.14	298.79	602.89	4.74	10.21	4	6	0
		2	0.456	14140	13182	9019	20535	439.96	302.41	603.89	2.44	11.3	3	2	0
		2	0.456	14100	11708	8552	20623	414.14	291.15	606.49	7.88	6.85	1	4	0
		2	0.462	14036	11792	9100	20892	597.87	304.16	614.51	1.81	6.46	2	3	0
		2	0.424	14039	12441	9246	20545	504.24	287.09	604.17	2.53	8.98	2	3	0
		2	0.424	14432	12283	8458	20772	519.81	287.31	610.94	3.77	11.95	2	3	0
		2	0.478	14413	11041	8627	20549	362.14	278.15	604.28	7.16	13.88	3	4	0
		2	0.439	14452	12178	8763	20709	452.44	287.9	609.07	4.73	12.66	3	4	0
		2	0.409	14432	12570	8635	20772	518.86	288.28	610.94	3.73	12.08	3	4	0
		2	0.534	14454	11663	8950	20824	522.19	301.87	612.5	2.58	8.97	3	4	0
		2	0.484	14408	11858	9178	19743	418.92	306.62	582.42	3.53	9.06	3	4	0
		2	0.49	14388	12105	9207	19826	381.04	305.43	582.72	2.44	10.15	3	4	0
		2	0.492	14464	11792	9100	20928	548.39	300.02	615.6	2.32	6.13	3	4	0
		2	0.452	14517	12219	9265	19731	407.11	308.99	579.9	2.27	9.06	3	2	0
		2	0.51	14574	11806	9116	21042	575.89	304.9	619	3.71	7.47	6	7	3.5
		2	0.491	14799	11934	9265	20916	577.7	309.3	615.23	4.54	6.82	6	7	3.5
		2	0.422	14559	12238	9080	20971	612.28	318.09	616.88	1.93	3.94	6	6	3.5
		2	0.495	14592	11970	9308	20010	450.06	309.41	588.23	2.81	7.67	6	7	3.5
		2	0.571	14528	12142	9050	19907	427.87	281.69	585.15	2.85	10.27	6	8	2
		2	0.617	14452	12394	9308	20857	535.84	310.31	613.47	2.74	10.33	6	8	2
		2	0.626	14561	11683	8620	21091	523.43	277.37	620.45	1.85	8.92	6	8	2
		2	0.42	14381	12295	8816	20290	476.23	277.47	596.56	6.2	13.29	6	8	2
		2	0.437	14351	12365	8619	20705	463.54	283.71	608.94	4.85	12.63	6	8	2.5
		2	0.47	14339	12119	8783	20541	478.91	296.51	604.06	3.65	10.66	6	5	1.5
		2	0.461	14407	12028	8841	20258	435.3	298.02	595.63	4.13	10.86	6	6	1.5
		2	0.475	14174	13091	8890	20484	486.65	299.48	600.18	3.28	10.03	6	6	1
		2	0.401	14385	11962	9190	20391	484.84	305.97	599.59	3.13	8.12	6	6	2.5
		2	0.433	14413	12008	9204	20526	503.24	306.56	603.61	3.02	7.71	6	5	3
		2	0.477	14398	11988	8965	20360	472.9	301	598.66	3.32	9.39	6	3	0
		2	0.479	14204	11996	9339	20762	553.98	310.64	610.63	3.25	6.47	6	3	0
		2	0.459	14250	13966	9265	20151	509.18	307.94	601.09	3.04	7.32	6	3	0
		2	0.442	14225	11000	9309	20568	520.64	297.1	602.69	2.92	6.94	3	4	0
		2	0.412	14281	11283	8549	20678	444.48	282.65	608.14	5.21	12.87	3	4	0
		2	0.412	14183	11832	9147	20334	496.73	305.22	597.88	2.53	7.29	3	1	0
		2	0.444	14143	12005	9361	20977	588.62	311.05	617.05	3.4	6.08	4	2	0
		2	0.451	14258	11954	9130	20621	510.46	304.76	606.42	2.77	7.55	4	2	0
		3	0.391	13191	23171	13191	23881	475.86	351.58	524.02	4.32	9.96	0	0	11
		3	0.407	14621	23161	10541	22635	464.3	349.76	505.55	3.73	9.84	0	0	11
		3	0.422	15231	23212	13321	23918	495.06	365.73	534.19	3.66	9.49	0	0	11
		3	0.421	14821	23078	9119	22891	495.35	345.12	511.27	4.02	10.26	0	0	11
		3	0.428	14011	23375	13410	23937	481.84	363.32	525.28	4.17	10.18	0	0	11
		3	0.439	14821	22533	7286	22937	489.59	334.58	512.28	3.58	8.68	0	0	11
		3	0.413	14411	22241	10951	23138	510.8	353	516.79	5.71	19.94	0	0	11
		3	0.406	15851	22533	12151	22729	535.11	371.41	518.86	4.61	16.43	0	0	12
		3	0.378	16151	22533	16251	22133	542.65	372	516.66	4.75	17.71	0	0	12
		3	0.383	16251	21985	16451	23283	517.57	351.08	521.89	4.68	13.65	0	0	12
		3	0.408	14411	22507	10951	22138	510.8	353	516.79	5.34	19.94	0	0	10
		3	0.436	15531	22339	14131	24188	454.37	349.7	517.89	5.56	16.62	0	0	10
		3	0.463	16861	22587	13761	25533	552.58	374.3	518.11	4.61	13.61	0	0	10
		3	0.36	16651	22587	17371	22833	555.08	374.08	519.31	4.83	11.26	0	0	10
		3	0.413	16351	22727	14251	21175	543.18	372.67	517.61	5.05	15.38	0	0	10
		3	0.373	16041	22727	10381	23339	532.49	355.1	521.26	5.27	17.36	0	0	10
		3	0.407	16681	22763	13161	25470	557.49	374.86	520.45	4.75	14.99	0	0	10
		3	0.401	16961	22599	15961	21218	556.43	374.52	518.56	5.12	15.25	0	0	10
		3	0.412	14411	22199	16111	25897	498.05	365.2	515.03	5.56	20.49	0	0	10
		3	0.358	15641	22559	15641	25600	477.09	357.35	517.74	5.41	19.36	0	0	10
		3	0.412	16251	22676	16151	21217	547.14	373.51	518.54	4.75	17.05	0	0	10
		3	0.369	16251	22880	15841	24214	460	361.72	520.34	4.9	12.19	0	0	10
		3	0.362	16961	22533	16961	21727	549.5	374.12	520.68	5.56	13.16	0	0	9
		3	0.426	15131	22625	10681	21966	475.4	359.02	512.94	4.17	15.38	0	0	10
		3	0.361	13910	22313	13910	23100	511.41	365.03	515.93	4.54	15.24	0	0	10
		3	0.43	13510	22391	13710	22046	494.05	363.8	514.71	4.1	12.65	0	0	9
		3	0.382	14721	22479	14721	24157	526.88	367.57	517.2	5.71	19.08	0	0	9
		3	0.413	14921	22479	15821	24421	542.35	367.96	519.37	5.63	17.74	0	0	9
		3	0.357	13710	22367	10810	22969	529.32	363.87	518.62	5.41	16.71	0	0	9
		3	0.384	14411	22676	12281	23277	545	357.02	519.87	4.46	12.34	0	0	9
		3	0.369	15231	22533	9119	26891	494.83	345.13	511.25	3.88	9.14	0	0	10
		3	0.438	20011	22880	9531	23736	571.75	359.19	526.4	5.19	14.8	0	0	10
		3	0.36	14211	22273	13810	22054	494.26	364.81	514.9	5.56	19.54	0	0	11
		3	0.352	16151	22274	15741	21426	480.19	360.45	517.61	5.34	19.6	0	0	11
		3	0.362	14231	22131	9734	22765	498.34	365.34	521.12	4.67	15.34	0	0	11
		3	0.385	13690	22243	13876	22321	511.23	342.12	515.21	4.34	12.89	0	0	10
		3	0.367	13671	22345	13765	22721	536.76	378.54	519.35	5.11	17.46	0	0	10
		3	0.412	14561	23024	14231	24600	488.76	336.12	513.34	4.23	9.45	0	0	10
		3	0.398	14780	23290	15507	26211	534.25	389.72	518.84	4.8	12.6	0	0	9
		3	0.432	13568	22378	11161	23245	530.78	361.57	512.37	5.34	16.25	0	0	9
		4	0.378	15372	16800	13244	18081	528.66	460.38	571.15	1.88	8.42	0	11	5.5
		4	0.392	15114	17189	12814	18280	529.88	434.12	572.6	1.83	7.49	0	11	5.5
		4	0.369	15127	17251	13124	18303	529.42	452.67	572.33	2.15	7.85	0	12	6
		4	0.399	15324	16667	13124	18978	528.11	457.53	575.11	1.75	7.49	0	11	5.5
		4	0.423	15154	16768	12687	18713	529.42	437.8	574.57	2	9.53	0	11	5.5
		4	0.407	15204	16830	12759	18325	529.88	455.16	583.21	1.73	9.55	0	11	5.5
		4	0.407	15214	17271	12871	18810	529.79	456.01	573.7	1.81	9.04	0	8	4
		4	0.373	15214	16881	13146	18342	531.98	455.45	573.7	1.81	9.04	0	8	4
		4	0.388	15204	17303	13284	18293	529.28	465.57	570.05	1.6	6.65	0	11	5.5
		4	0.405	15250	16654	13113	18158	528.45	454.33	572.72	1.68	7.6	0	11	5.5
		4	0.375	15165	17251	13074	18333	532.65	450.04	570.76	1.71	8.56	0	11	5.5
		4	0.398	15355	17370	13179	18252	524.46	459.08	569.78	1.62	7.11	0	9	4.5
		4	0.408	15260	17135	13052	18061	530.35	453.21	575.67	1.69	7.12	0	9	4.5
		4	0.423	15167	17322	12805	18115	528.11	455.71	569.95	2.29	8.21	0	9	4.5
		4	0.417	15156	17199	13015	18408	529.92	451.58	571.56	1.77	7.24	0	9	4.5
		4	0.424	15160	17293	13076	18566	525	439.24	578.24	1.93	8.54	0	9	4.5
		4	0.411	15252	16800	12621	18826	530.25	447.12	572.62	2.39	9.64	0	9	4.5
		4	0.424	15264	16840	12829	18775	527.05	453.27	574.15	1.95	8.82	0	10	5
		4	0.438	15230	17271	12556	18111	523.76	440.46	572.64	2.72	6.65	0	10	5
		4	0.398	15124	16988	13015	18166	521.08	451.13	567.3	1.82	8.81	0	10	5
		4	0.398	15080	17000	13180	18610	530.31	457.08	568.93	2.08	11.84	0	10	5
		4	0.394	15387	17322	13243	18451	533.36	459.2	576	2.48	11.43	0	10	5
		4	0.438	15154	17031	13307	18407	526.7	463.65	569.16	2.42	11.25	0	10	5
		4	0.444	15524	16827	13113	18394	516.41	455.33	567.86	2.34	10.16	0	10	5
		4	0.438	15070	16695	12748	18456	524.4	441.55	575.75	3.18	13.92	0	11	5.5
		4	0.438	15029	16594	12873	18324	522.69	443.14	578.24	2.13	14	0	11	5.5
		4	0.444	15044	16654	12509	18522	530.72	433.81	573.66	3.57	12.46	0	11	5.5
		4	0.404	15029	16866	13201	18500	525.3	450.15	577.51	2.31	12.68	0	11	5.5
		4	0.446	15575	16708	12940	18960	524.42	447.85	571.05	2.02	11.86	0	11	5.5
		4	0.464	15062	17005	13265	18826	524.65	456.8	584.37	1.9	9.67	0	11	5.5
		4	0.444	15083	16835	13326	18762	523	457.51	584.53	2.71	10.18	0	11	5.5
		4	0.457	15040	16635	13265	18544	524.42	462.66	584.68	3.12	10.22	0	13	6.5
		4	0.457	15062	17015	13265	18951	522.81	456.8	584.37	2.5	9.67	0	13	6.5
		4	0.451	15351	17124	13265	18277	531.13	451.39	586.17	2.2	8.97	0	11	5.5
		4	0.342	15235	17209	12933	18867	530.72	462.39	572.25	2.04	6.79	0	9	4.5
		4	0.404	15344	16831	13027	18405	533.89	446.58	569.16	1.73	8.2	0	13	6.5
		4	0.364	15455	17103	12598	18089	533.36	447.6	576.08	3.31	11.61	0	13	6.5
		4	0.361	15230	16641	13066	18581	532.31	446.62	580.43	3.41	15.4	0	9	4.5
		4	0.436	15040	16631	12600	18509	531.32	432.11	567.34	2.42	9.16	0	9	4.5
		4	0.445	15425	17306	12903	18123	520.76	456.34	584.32	2.45	9.56	0	9	4.5
		4	0.401	15130	17171	13280	18320	520.72	441.34	553.26	1.67	11.12	0	9	4.5
		4	0.403	15424	16948	13143	18671	527.3	453.45	567.31	1.94	12.22	0	9	4.5
		4	0.436	15030	17300	13007	18467	521.42	445.1	551.25	2.19	13	0	9	4.5
		4	0.421	15387	17022	13113	18384	521.25	462.35	582.27	1.92	12.26	0	8	4
		4	0.401	15044	17241	12648	18566	513	442.13	582.52	2.62	12.18	0	8	4
		4	0.389	15534	16427	12863	18224	514.23	431.52	580.32	1.72	11.26	0	10	5
		4	0.367	15320	16795	12609	18562	523.21	446.24	586.21	2.01	9.87	0	10	5
		4	0.414	15080	17151	12860	18400	520.14	463.61	581.56	2.28	10.38	0	10	5
		4	0.454	15162	16790	13155	18222	522.02	438.25	573.45	2.33	10.62	0	10	5
		4	0.433	15351	17145	12916	18021	516.32	436.41	570.23	1.94	9.62	0	10	5
		4	0.39	15275	17352	13055	18215	525.03	461.61	576.34	1.91	8.56	0	11	5.5
		4	0.367	15154	17299	13165	18438	510.21	455.56	564.3	2.3	9.68	0	11	5.5
		5	0.135	12991	16251	12370	19789	549.73	413.21	618.32	3.46	17.6	6	2	0
		5	0.149	14721	16551	12570	20435	546.54	417.46	633.07	2.65	11.28	8	2	0
		5	0.166	11611	16351	12216	20413	554.53	406.84	632.41	2.76	14.54	11	1	0
		5	0.168	12891	16151	12360	20033	512.08	417.47	632.21	2.69	13.58	11	1	0
		5	0.17	12481	16041	12315	20397	518.2	410.79	631.94	3.19	15.64	11	1	0
		5	0.176	16861	10511	12728	20027	522.99	423.73	614.31	3	10.6	10	1	0
		5	0.175	15331	11461	12098	19851	572.44	408.69	615.73	2.79	9.36	10	1	0
		5	0.177	17881	12481	12315	19995	493.79	414.9	620.03	4.89	9.45	10	1	0
		5	0.175	18181	15331	12597	20210	546.9	422.39	626.38	2.27	10.15	0	2	0
		5	0.174	19711	14821	12551	20331	592.61	424.09	629.99	4.52	10.14	1	1	0
		5	0.168	10751	11871	12110	19891	621.63	416.98	605.85	2.6	14.07	2	1	0
		5	0.157	13810	11361	12186	19273	436.59	405.99	616.3	4.83	10.89	2	1	0
		5	0.159	16961	13091	12081	20037	468.16	414.41	621.24	4.09	6.64	2	1	0
		5	0.157	17770	13710	12444	20173	538.36	416.4	625.3	2.21	5.88	2	1	0
		5	0.156	19410	12891	12360	20241	570.78	397.75	627.31	4.1	5.75	3	2	0
		5	0.112	16251	16151	12732	20451	580.07	419.88	631.32	3.61	17.56	4	1	0
		5	0.163	13410	11561	13210	19469	560.29	405.53	604.41	4.12	19.57	5	1	0
		5	0.16	15531	10951	12136	19560	478.4	403.4	607.09	3.43	19.63	5	1	0
		5	0.152	15741	8915	11854	19540	486.49	394.07	606.51	3.14	16.96	3	1	0
		5	0.154	13610	11921	12434	20440	489.44	415.52	631.01	3.84	18	3	2	0
		5	0.157	11661	11051	12048	19434	520.46	406.89	603.37	3.98	18.51	3	2	0
		5	0.156	16551	11781	12348	19639	467.14	413.08	609.44	2.58	16.02	3	2	0
		5	0.137	15331	12681	13337	19551	516.32	411.91	606.82	2.64	16.97	4	3	0
		5	0.151	12681	11241	12148	20440	498.49	412.77	633.23	2.48	14.46	5	3	0
		5	0.165	14921	17271	12560	19276	541.9	421.87	609.75	5	23.38	5	3	0
		5	0.153	14211	16861	12493	19679	511.98	418.55	619.49	4.24	17.76	5	3	0
		5	0.151	15741	15781	12633	19632	521.11	422.86	611.45	5.12	20.23	6	3	0
		5	0.157	15331	13510	12024	19960	515.57	415.25	618.96	2.63	8.66	6	3	0
		5	0.147	11161	.	12162	19481	539.61	405.91	604.76	2.69	11.64	6	3	0
		5	0.161	12991	12171	12281	20466	450.74	413.86	607.4	2.02	10.91	6	4	0
		5	0.164	15331	12581	12326	19681	477.01	413.38	615.11	2.05	10.11	6	3	0
		5	0.166	15231	12781	12348	19608	496.41	408.03	608.53	4.15	11.16	6	3	0
		5	0.17	14921	14341	12560	20346	483.82	400.51	630.44	2.19	9.2	6	3	0
		5	0.172	13191	11481	12315	19542	493.72	401.87	606.56	4.15	9.85	6	3	0
		5	0.177	14721	11281	12293	19563	466.77	412.12	616.04	2.17	10.13	6	3	0
		5	0.164	12891	14231	12360	19457	477.12	411.5	604.03	4.43	12.08	5	3	0
		5	0.163	15841	13510	12424	19936	467.67	416.07	618.25	2.96	10.43	6	3	0
		5	0.165	9424	16041	11930	20429	552.73	395.09	632.9	3.01	13.22	6	3	0
		5	0.165	11871	17371	12247	20425	459.76	402.19	632.79	2.5	12.16	6	3	0
		5	0.141	10681	15641	12337	19872	479.41	413.38	598.63	5.44	13.91	6	3	0
		5	0.176	14111	15331	12038	19675	462.24	417.1	610.52	2.1	10.78	6	3	0
		5	0.178	16251	13410	12414	20031	505.02	412.8	614.42	1.9	9.23	6	3	0
		5	0.163	11771	9832	11988	20257	529.04	408.85	598.98	2.73	15.53	5	1	0
		5	0.18	15741	9818	12539	19295	468.48	391.94	599.25	4.81	15.61	6	3	0
		5	0.174	11871	9719	11885	19486	410.43	393.81	604.92	2.96	16.6	6	3	0
		5	0.181	12171	10171	11869	19394	454.7	394.32	602.17	3.04	18.53	6	3	0
		5	0.182	11051	10041	12388	19317	434.99	393.53	602.1	4.42	18.34	6	3	0
		5	0.156	14411	10091	11705	19845	422.08	393.32	615.55	2.86	12.23	6	3	0
		5	0.147	12381	10006	11773	20139	439.33	396.39	599.91	4.38	22.14	6	3	0
		5	0.143	12171	17061	12281	20151	441.44	410.34	624.66	5.59	14.02	6	5	0
		5	0.175	10851	11871	12123	19699	475.86	405.01	602.37	2.07	11.58	6	3	0
		5	0.178	11971	11871	12247	19265	443.3	409.07	607.2	1.92	10.55	11	1	0
		5	0.176	12781	12091	12348	20149	491.06	395.38	609.08	3.9	13.48	11	1	0
		5	0.177	14211	13710	12444	20052	501.01	405.64	617.28	2.12	9.99	11	1	0
		5	0.176	13910	19210	12212	20014	527.59	411.22	620.58	4.71	14	6	3	0
		6	0.092	11639	11520	10911	17788	568.18	388.29	581.43	3.57	11.04	6	3	0
		6	0.092	11534	11336	10831	17987	485.71	387.36	568.9	3.05	10.96	6	3	0
		6	0.087	11555	11446	10885	17764	458.21	387.78	562.11	3.01	12.04	6	3	0
		6	0.081	11500	11748	10911	18182	533.8	388.78	574.85	3.55	13.84	6	3	0
		6	0.086	11511	11781	10844	18121	522.95	386.19	572.97	3.36	14.63	6	3	0
		6	0.086	11608	11432	10857	17551	442.06	385.04	555.64	2.34	12.92	6	1	0
		6	0.098	11650	11350	10844	17861	468.62	378.71	565.06	2.83	10.5	6	2	0
		6	0.112	11787	11473	10963	17900	522.92	393	566.26	1.9	10.38	6	2	0
		6	0.107	11393	11901	10696	18250	603	395.37	576.89	1.54	6.07	6	2	0
		6	0.073	11488	11489	10625	17611	409.29	365.5	557.46	4.6	18.74	6	2	0
		6	0.087	11576	11345	10535	17710	442.03	367.47	560.45	4.47	13.32	6	3	0
		6	0.081	11522	11419	10911	17893	492.1	385.94	566.05	4.41	14.5	6	4	0
		6	0.077	11555	11336	10831	17589	442.16	385.01	556.8	4.65	14.85	6	4	0
		6	0.1	11477	11621	10911	17943	488.84	385.83	567.56	4.27	12.56	6	1	0
		6	0.092	11369	11350	10817	17698	453.67	381.45	560.1	4.33	17.37	5	2	0
		6	0.146	11369	11171	10671	18013	458.91	379.85	569.71	4.26	13.28	5	3	0
		6	0.1	11135	11292	10687	17691	446.18	380.55	559.88	4.65	18.44	6	1	0
		6	0.093	11369	11308	10511	17758	449.7	373.05	561.94	3.89	16.59	6	2	0
		6	0.077	11381	11589	10616	17684	446.44	365.32	559.69	5.58	16.66	5	2	0
		6	0.069	11344	11802	10701	17680	487.52	369.21	563.7	4	8.73	6	2	0
		6	0.068	11222	11802	10657	17828	484.78	380.75	564.05	4.45	13.5	6	2	0
		6	0.067	11222	11855	10511	17906	481.33	374.57	566.44	3.64	9.27	6	3	0
		6	0.088	11544	11623	10511	17769	464.8	375.17	562.27	3.9	12.77	5	3	0
		6	0.107	11854	11845	10898	18092	505.6	388.07	572.1	3.94	15.65	5	3	0
		6	0.075	11879	11263	10760	17652	456.07	380.22	558.7	4.32	16.43	5	3	0
		6	0.086	11555	11292	10788	17771	471.97	384.74	562.31	3.32	17.11	5	3	0
		6	0.058	11393	11520	10911	17731	492.18	389.13	561.12	2.49	11.17	5	3	0
		6	0.133	11453	11640	10716	17926	454.01	382.28	567.04	2.76	13.88	5	4	0
		6	0.127	11500	11562	10788	17954	493.8	380.82	567.89	4.24	13.48	6	1	0
		6	0.051	11331	11802	10844	17690	482.84	387.53	559.86	3.47	14.32	4	1	0
		6	0.086	11369	11248	10641	17603	432.34	380.22	557.21	3.71	13.75	4	1	0
		6	0.104	11442	11834	10687	18010	488.29	381.26	569.6	3.72	15.85	4	2	0
		6	0.063	11466	11748	10774	17577	461.42	383.9	556.43	2.84	15.18	4	2	0
		6	0.11	11591	11546	10803	18101	503.69	384.66	572.37	4.11	15.22	6	3	0
		6	0.063	11682	11234	10989	17547	445.43	383.13	555.52	3.74	17.07	6	2	0
		6	0.063	11613	11263	10760	17615	457.23	375.71	557.56	2.69	12.55	6	2	0
		6	0.13	11453	11488	10803	17970	456.78	382.16	568.38	2.99	14.64	6	2	0
		6	0.081	11208	11583	10716	17658	444.91	383.4	558.88	3.88	15.26	6	1	0
		6	0.108	11647	11156	10766	18013	435.64	375.65	561.45	4.67	15.04	6	1	0
		6	0.074	11165	11171	10762	17681	455.4	380.21	559.59	3.21	13.33	6	1	0
		6	0.1	11394	11234	10761	17891	470.97	373.92	565.97	4.02	11.7	6	3	0
		6	0.092	11739	11156	10757	17740	440.77	376.7	575.84	3.39	12.68	6	2	0
		6	0.108	11483	11422	10753	18054	482.5	390.34	570.94	3.25	10.83	6	3	0
